# Supplementary material for: Impact of quadrivalent influenza vaccine on public health and influenza-related costs in Australia
Source: BMC Public Health. 2016 Jul 22;16:630. doi: 10.1186/s12889-016-3297-1 (PMC4957923; doi:10.1186/s12889-016-3297-1)
Supplement: Additional file 1: — Input parameters for the deterministic sensitivity analyses. The table contains the low and high values for every parameter which was tested in the deterministic sensitivity analyses as well as the sources for these values. (XLSX 15 kb) [file 12889_2016_3297_MOESM1_ESM.xlsx]

## Sheet: Sheet1
	Parameter	Base case value	Low value	High value	Source
	Proportion of population with at least one risk factor
	6-59 months	0.13	0.104	0.157	Computed from the confidence intervals from base case source: Australian Bureau of Statistics (ABS). Australian Health Survey 2011-2013. http://www.abs.gov.au/australianhealthsurvey. Accessed 02/03/2016.
	5-17 years	0.139	0.111	0.166
	18-49 years	0.218	0.174	0.261
	50-64 years	0.315	0.252	0.378
	Vaccination coverage
	6-59 months	0.413	0.322	0.498	95% confidence intervals from base case source: Newcombe J, Kaur R, Wood N, Seale H, Palasanthiran P, Snelling T. Prevalence and determinants of influenza vaccine coverage at tertiary pediatric hospitals. Vaccine. 2014;32:6364-8.
	5-17 years	0.413	0.322	0.498
	18-49 years	0.362	0.264	0.562	Australian Institute of Health and Welfare (AIHW). 2009 Adult Vaccination Survey: summary results. http://www.aihw.gov.au/publication-detail/?id=10737418409. Accessed 02/03/2016. The source did not allow to compute confidence intervals. Instead, it was chosen to take as bounds the covarage in the territories with the lowest and highest coverage rates respectively.
	50-64 years	0.362	0.264	0.562
	65 years and older	0.746	0.731	0.76	Lower and upper bound reported in base case source: AIHW. 2009 Adult Vaccination Survey: summary results. 2011.
	Number of working days lost per GP consultation
	6-47 months & 5-17 years	0.64	0.59	0.69	Confidence intervals were computed from base case source: Esposito S, Cantarutti L, Molteni CG, Daleno C, Scala A, Tagliabue C, et al. Clinical manifestations and socio-economic impact of influenza among healthy children in the community. J Infect. 2011;62:379-87.
	18-49 years & 50-64 years	2.59	2.34	2.84	Confidence intervals were computed from base case source: Carrat F, Sahler C, Rogez S, Leruez-Ville M, Freymuth F, Le GC, et al. Influenza burden of illness: estimates from a national prospective survey of household contacts in France. Arch Intern Med. 2002;162:1842-8.
	Vaccine effectiveness against mismatched B lineage
	6-59 months	0.67	0.53	0.8	TIV B lineage cross-protection was assumed to vary by ±20% around the base case value.
	5-17 years	0.67	0.54	0.81
	18-49 years	0.68	0.54	0.81
	50-64 years	0.67	0.54	0.81
	65 years and older	0.68	0.54	0.82
	Cost of GP consultation (in A$)
	All age groups	$37.1	$17.0	$71.7	Derived from base case source: Australian Government Department of Health. Medicare Benefits Schedule. http://www.mbsonline.gov.au/internet/mbsonline/publishing.nsf/Content/Home. Accessed 02/03/2016. Low value: Cost of a brief consultation (Item N°3) High value: Cost of a long consultation (Item N°36)
	Cost of hospitalisation (in A$)
	6-59 months	$3,944	$3,399	$6,954	Derived from base case sources: The Independent Hospital Pricing Authority (IHPA). National Hospital Cost Data Collection Australian Public Hospitals Cost Report 2011-2012, Round 16. https://www.ihpa.gov.au/publications/nhcdc-australian-public-hospitals-cost-report-2011-2012-round-16. Accessed 01/03/2016. Australian Institute of Health and Welfare (AIHW). Australian refined diagnosis-related grou…
	5-17 years	$4,811	$3,761	$8,659
	18-49 years	$5,644	$4,309	$8,059
	50-64 years	$7,497	$5,192	$9,457
	65 years and older	$10,141	$6,430	$11,498
	Proportion of B strain
	2002	0.228	0.147	0.309	Derived from base case by varying the base case values using the coefficient of variation calculated over the period 2002-2012 (2009 excluded). Coefficient of variation was 35%.
	2003	0.008	0.005	0.011
	2004	0.25	0.161	0.339
	2005	0.215	0.139	0.291
	2006	0.344	0.222	0.466
	2007	0.053	0.034	0.072
	2008	0.633	0.409	0.857
	2010	0.127	0.082	0.172
	2011	0.312	0.202	0.422
	2012	0.305	0.197	0.413
	Proportion of mismatched B lineage
	2002	0.96	0.62	1	Derived from base case by varying the base case values using the coefficient of variation calculated over the period 2002-2012 (2009 excluded). Coefficient of variation was 34%.
	2003	0.8	0.517	1
	2004	0.833	0.538	1
	2005	0.483	0.312	0.654
	2006	0.045	0.029	0.061
	2007	0.78	0.504	1
	2008	0.512	0.331	0.693
	2010	0.092	0.059	0.125
	2011	0.018	0.012	0.024
	2012	0.861	0.556	1
	Average Influenza attack rate
	6-59 months	0.188	0.173	0.203	Low value: Lower bound of 95% confidence interval from base case source: Jefferson T, Rivetti A, Di PC, Demicheli V, Ferroni E. Vaccines for preventing influenza in healthy children. Cochrane Database Syst Rev. 2012;8:CD004879. High value: Molinari NA, Ortega-Sanchez IR, Messonnier ML, Thompson WW, Wortley PM, Weintraub E, et al. The annual impact of seasonal influenza in the US: measuring diseas…
	5-17 years	0.165	0.102	0.175	Low value: Molinari NA, Ortega-Sanchez IR, Messonnier ML, Thompson WW, Wortley PM, Weintraub E, et al. The annual impact of seasonal influenza in the US: measuring disease burden and costs. Vaccine. 2007;25:5086-96. High value: Upper bound of 95% confidence interval from base case source: Jefferson T, Rivetti A, Di PC, Demicheli V, Ferroni E. Vaccines for preventing influenza in healthy children.…
	18-49 years	0.036	0.033	0.066	Low value: Lower bound of 95% confidence interval from base case source: Jefferson T, Di PC, Rivetti A, Bawazeer GA, Al-Ansary LA, Ferroni E. Vaccines for preventing influenza in healthy adults. Cochrane Database Syst Rev. 2010:CD001269. High value: Molinari NA, Ortega-Sanchez IR, Messonnier ML, Thompson WW, Wortley PM, Weintraub E, et al. The annual impact of seasonal influenza in the US: measur…
	50-64 years	0.036	0.033	0.066	Low value: Lower bound of 95% confidence interval from base case source: Jefferson T, Di PC, Rivetti A, Bawazeer GA, Al-Ansary LA, Ferroni E. Vaccines for preventing influenza in healthy adults. Cochrane Database Syst Rev. 2010:CD001269. High value: Molinari NA, Ortega-Sanchez IR, Messonnier ML, Thompson WW, Wortley PM, Weintraub E, et al. The annual impact of seasonal influenza in the US: measur…
	65 years and older	0.049	0.0357	0.09	Low value: Lower bound of 95% confidence interval from base case source: Upper value: Jefferson T, Di PC, Al-Ansary LA, Ferroni E, Thorning S, Thomas RE. Vaccines for preventing influenza in the elderly. Cochrane Database Syst Rev. 2010:CD004876. High value: Molinari NA, Ortega-Sanchez IR, Messonnier ML, Thompson WW, Wortley PM, Weintraub E, et al. The annual impact of seasonal influenza in the U…
	GP consultation rate (per influenza case)
	6-59 months	0.91	0.455	1	Low value: value for people at low risk from base case source: Molinari NA, Ortega-Sanchez IR, Messonnier ML, Thompson WW, Wortley PM, Weintraub E, et al. The annual impact of seasonal influenza in the US: measuring disease burden and costs. Vaccine. 2007;25:5086-96. High value: assumed to be 100%
	5-17 years	0.636	0.318	0.836	Low value: value for people at low risk from base case source. High value: assumed to be higher of 20 percentage points from base case source. Molinari NA, Ortega-Sanchez IR, Messonnier ML, Thompson WW, Wortley PM, Weintraub E, et al. The annual impact of seasonal influenza in the US: measuring disease burden and costs. Vaccine. 2007;25:5086-96.
	18-49 years	0.626	0.313	0.826	Low value: value for people at low risk from base case source. High value: assumed to be higher of 20 percentage points from base case source. Molinari NA, Ortega-Sanchez IR, Messonnier ML, Thompson WW, Wortley PM, Weintraub E, et al. The annual impact of seasonal influenza in the US: measuring disease burden and costs. Vaccine. 2007;25:5086-96.
	50-64 years	0.626	0.313	0.826	Low value: value for people at low risk from base case source. High value: assumed to be higher of 20 percentage points from base case source. Molinari NA, Ortega-Sanchez IR, Messonnier ML, Thompson WW, Wortley PM, Weintraub E, et al. The annual impact of seasonal influenza in the US: measuring disease burden and costs. Vaccine. 2007;25:5086-96.
	65 years and older	0.722	0.62	0.82	Low value: value for people at low risk from base case source. High value: value for people at high risk from base case source. Molinari NA, Ortega-Sanchez IR, Messonnier ML, Thompson WW, Wortley PM, Weintraub E, et al. The annual impact of seasonal influenza in the US: measuring disease burden and costs. Vaccine. 2007;25:5086-96.
	Hospitalisation rate (per 100,000 in general population)
	6-59 months	105.8	51.1	160.5	Confidence intervals from base case source: Newall AT, Scuffham PA. Influenza-related disease: the cost to the Australian healthcare system. Vaccine. 2008;26:6818-23.
	5-17 years	15.9	7.6	24.1
	18-49 years	30.7	16.3	45.2
	50-64 years	91	63.9	118.1
	65 years and older	440.3	372.9	507.8
